# Supplementary material for: The ‘Best Practice Guide to Conservative Management of Patellofemoral Pain’: incorporating level 1 evidence with expert clinical reasoning
Source: HighWire-hosted journal article supplement (doi:10.1136/bjsports-2014-093637), 2015-02-25
Supplement: bjsports-2014-093637supp_figure.pdf [file bjsports-2014-093637supp_figure.pdf]

# Clinical diagnosis of Patellofemoral Pain

## Assessment components

### Biomechanics

1. Bracing (PFJ and pronotics)
2. Bandage
3. Foot orthoses (customised vs prefabricated)
4. Gait retraining/movement patterns.

### Flexibility / ROM

1. Stretching of hip, hamstring, calf, iliotibial band
2. Joint mobilisation PFJ
3. Muscle flexibility
4. Fascial lengthening–ITB
5. Neural mobilisation (especially femoral nerve)

### Activity pattern

1. Reduction of primary aggravating factors
2. Reduction of compounding sports activity

### Muscle re-education

1. Quadriceps strengthening
2. Hip strengthening
3. Open kinetic chain exercises
4. Closed kinetic chain exercises
5. Biofeedback
6. Supervised vs unsupervised exercise.

### Pain

1. Acupuncture
2. Manipulative therapy
3. Massage
4. Taping
5. Ultrasound

### Lack of knowledge

1. Patient-specific advice and education.

Clinical summary summarising treatment modality options for PFP management
