# Supplementary material for: The ‘Best Practice Guide to Conservative Management of Patellofemoral Pain’: incorporating level 1 evidence with expert clinical reasoning
Source: HighWire-hosted journal article supplement (doi:10.1136/bjsports-2014-093637), 2015-02-25
Supplement: bjsports-2014-093637supp_table1.pdf [file bjsports-2014-093637supp_table1.pdf]

Supplementary File 1

| Profession         | Academic role            | Years of clinical experience | Current clinical hours per week | Average PFP patients seen per week | Country   |
|--------------------|--------------------------|------------------------------|---------------------------------|------------------------------------|-----------|
| Physiotherapist    | Post-doctoral researcher | 7                            | 20                              | 4-5                                | Australia |
| Physiotherapist    | PhD candidate            | 7                            | 30                              | 2-3                                | UK        |
| Physiotherapist    | Post-doctoral researcher | 21                           | 20                              | 1-2                                | UK        |
| Physiotherapist    | Post-doctoral researcher | 10                           | 9                               | 12-18                              | Australia |
| Physiotherapist    | Professor                | 32                           | Not stated                      | 5                                  | Australia |
| Physiotherapist    | Associate Professor      | 28                           | 4                               | 5-6                                | UK        |
| Physiotherapist    | Professor                | 28                           | Not stated                      | Not stated                         | Australia |
| Athletic Trainer   | Assistant Professor      | 10                           | 4                               | 1                                  | USA       |
| Physiotherapist    | Clinical researcher      | 30                           | 30                              | 15                                 | Australia |
| Physiotherapist    | Professor                | 29                           | 20                              | 1-2                                | UK        |
| Physical Therapist | Professor                | 26                           | 15                              | 3-5                                | USA       |
| Physiotherapist    | Post-doctoral researcher | 22                           | Not stated                      | 5-10                               | UK        |
| Physiotherapist    | Clinical researcher      | 32                           | 20                              | 3                                  | Australia |

Supplementary File 1

|                    |                     |    |            |     |         |
|--------------------|---------------------|----|------------|-----|---------|
| Athletic Trainer   | Associate Professor | 15 | 10         | 4-6 | Canada  |
| Physical Therapist | Professor           | 35 | 10         | 1   | USA     |
| Physiotherapist    | Professor           | 22 | 4-8        | 10  | Belgium |
| Athletic Trainer   | Associate Professor | 15 | Not stated | 2-3 | USA     |
