# Supplementary material for: The ‘Best Practice Guide to Conservative Management of Patellofemoral Pain’: incorporating level 1 evidence with expert clinical reasoning
Source: HighWire-hosted journal article supplement (doi:10.1136/bjsports-2014-093637), 2015-02-25
Supplement: bjsports-2014-093637supp_table3.pdf [file bjsports-2014-093637supp_table3.pdf]

| EDUCATION                                                                                                                                                                                                                                                                                                                                                                                                              | ACTIVE REHABILITATION                                                                                                                                                                                                                                                                                                                                                                                                                                                                                                                                                                                                                                                                                                                                                                                                                                                                                                                                                                                                                                                         | PASSIVE INTERVENTIONS                                                                                                                                                                                                                                                                                                                                                                                                                                                                                                                                                                                                                                                                                                                                                                                                                                                      |
|------------------------------------------------------------------------------------------------------------------------------------------------------------------------------------------------------------------------------------------------------------------------------------------------------------------------------------------------------------------------------------------------------------------------|-------------------------------------------------------------------------------------------------------------------------------------------------------------------------------------------------------------------------------------------------------------------------------------------------------------------------------------------------------------------------------------------------------------------------------------------------------------------------------------------------------------------------------------------------------------------------------------------------------------------------------------------------------------------------------------------------------------------------------------------------------------------------------------------------------------------------------------------------------------------------------------------------------------------------------------------------------------------------------------------------------------------------------------------------------------------------------|----------------------------------------------------------------------------------------------------------------------------------------------------------------------------------------------------------------------------------------------------------------------------------------------------------------------------------------------------------------------------------------------------------------------------------------------------------------------------------------------------------------------------------------------------------------------------------------------------------------------------------------------------------------------------------------------------------------------------------------------------------------------------------------------------------------------------------------------------------------------------|
| <ol style="list-style-type: none"> <li>1. <i>Ensure the patients understands potential contributing factors to her/his condition and treatment options</i></li> <li>2. <i>Advise of appropriate activity modification</i></li> <li>3. <i>Manage the patient's expectations regarding rehabilitation</i></li> <li>4. <i>Encourage and emphasise the importance of participation in active rehabilitation</i></li> </ol> | <p><u>Principles</u></p> <ol style="list-style-type: none"> <li>1. <i>Give preference to closed kinetic chain exercises to replicate function</i></li> <li>2. <i>Consider open kinetic chain exercises in early stages of rehabilitation to target specific strength deficits and movements</i></li> <li>3. <i>Provide adequate supervision in the early stages to ensure correct exercise techniques, but progress to independence as soon as possible</i></li> <li>4. <i>When independent, limit the number of exercises to 3 or 4 to aid compliance</i></li> <li>5. <i>Use biofeedback such as mirrors and videos to improve exercise quality</i></li> </ol> <p><u>Specifics</u></p> <ol style="list-style-type: none"> <li>1. <i>Incorporate quadriceps and gluteal strengthening</i></li> <li>2. <i>Target distal and core muscles where deficits exist</i></li> <li>3. <i>Consider stretching, particularly of the calf and hamstrings, based on assessment findings</i></li> <li>4. <i>Incorporate movement pattern retraining, particularly of the hip</i></li> </ol> | <p><u>Pain reduction</u></p> <ol style="list-style-type: none"> <li>1. <i>Provide tailored patellar taping to reduce pain in the immediate term</i></li> <li>2. <i>PFJ braces where taping is inappropriate (e.g. skin irritation)</i></li> <li>3. <i>Consider foot orthoses</i></li> </ol> <p><u>Optimising biomechanics</u></p> <ol style="list-style-type: none"> <li>1. <i>Consider foot orthoses based on assessment findings (i.e. presence of excessive dynamic pronation)</i></li> <li>2. <i>Consider massage and acupuncture/dry needling to improve the flexibility of tight muscle and fasciae structures, particularly laterally</i></li> <li>3. <i>Consider PFJ mobilisation but only in the presence of hypo-mobility</i></li> <li>4. <i>Consider mobilisation of the ankle and first ray in the presence of sagittal plane joint restriction</i></li> </ol> |

*Italics = based on expert opinion without supporting Level 1 evidence*
